# Supplementary material for: A proteomic view on lysosomes
Source: Royal Society of Chemistry journal article supplement (doi:10.1039/d1mo00205h), 2021-08-26
Supplement: d1mo00205h1.xlsx [file d1mo00205h1.xlsx]

## Sheet: Table S1
Gene Names	Panther_Human	Panther_Mouse	Uniprot_Human	Uniprot_Mouse	Thelen et al. 2017	Grand Total	Manually curated	Protein class
ABCA13	1					1
ABCA2	1	1	1	1	1	5	1	Transporters, Channels, and Exchangers
ABCA3			1	1		2	1	Transporters, Channels, and Exchangers
ABCA5	1	1	1	1		4	1	Transporters, Channels, and Exchangers
ABCB6			1	1	1	3	1	Transporters, Channels, and Exchangers
ABCB9	1	1	1	1	1	5	1	Transporters, Channels, and Exchangers
ABCC10	1					1	1	Transporters, Channels, and Exchangers
ABCD1	1	1	1	1		4	1	Transporters, Channels, and Exchangers
ABCD4	1		1	1	1	4	1	Transporters, Channels, and Exchangers
ABHD6			1	1		2
ACAN	1					1
ACE	1	1				2
ACLY	1					1
ACP2	1	1	1		1	4	1	Phosphatases
ACP5	1	1	1	1	1	5	1	Phosphatases
ACPP	1	1				2	1	Phosphatases
ACTR10	1					1
ACTR2	1					1
ADA	1	1	1			3	1	Nucleases
ADAM8	1	1				2
ADRB2	1		1	1		3
AGA	1	1			1	3	1	Hydrolysis of Glycosidic Bonds
AGRN	1					1
AHNAK	1					1
AKR1B1	1	1				2
AKR1B10	1		1			2
AKT1S1			1	1	1	3	1	mTOR Complex 1-Associated
ALDOB		1				1
ANK2	1	1	1	1		4
ANK3	1	1	1	1		4
ANKFY1	1		1	1		3
ANKRD27	1	1	1	1		4
ANPEP	1					1
ANXA1	1	1				2	1	Ca-binding Proteins
ANXA11	1	1				2	1	Ca-binding Proteins
ANXA2	1	1				2	1	Ca-binding Proteins
ANXA6	1	1				2	1	Ca-binding Proteins
AOAH					1	1	1	Lipases
AP1AR			1			1
AP1B1	1					1
AP1G1	1					1
AP1M1	1					1
AP1M2	1					1
AP1S1	1					1
AP1S2	1					1
AP1S3	1					1
AP2A1	1					1
AP2A2	1					1
AP2B1	1					1
AP2M1	1					1
AP2S1	1					1
AP3B1	1		1	1		3
AP3B2			1	1		2
AP3D1	1		1	1		3
AP3M1	1		1	1		3
AP3M2			1			1
AP3S1			1	1		2
AP3S2			1	1		2
AP5B1	1		1			2	1	AP Complexes
AP5M1	1	1	1	1		4	1	AP Complexes
AP5S1	1	1	1	1		4	1	AP Complexes
APCS					1	1
APOA5			1	1		2
APOB	1					1	1	Apolipoprotein-related
APOE		1				1	1	Apolipoprotein-related
APP			1	1		2
AQP2		1	1			2
ARG1	1					1
ARL8A	1	1	1	1	1	5	1	Lysosomal Positioning
ARL8B	1	1	1	1	1	5	1	Lysosomal Positioning
ARRB1	1					1
ARRDC3	1	1	1	1		4
ARSA	1	1	1	1	1	5	1	Sulfatases
ARSB	1	1	1	1	1	5	1	Sulfatases
ARSD	1					1
ARSG	1	1	1	1	1	5	1	Sulfatases
ARSK					1	1	1	Sulfatases
ASAH1	1	1	1	1	1	5	1	Lipases
ASS1	1	1				2
ATP10B			1	1		2	1	Transporters, Channels, and Exchangers
ATP11A	1					1
ATP11B	1					1
ATP11C	1					1
ATP13A2	1	1	1	1		4	1	Transporters, Channels, and Exchangers
ATP6AP1					1	1	1	V-ATPase Complex
ATP6AP2			1	1		2	1	V-ATPase Complex
ATP6V0A1	1				1	2	1	V-ATPase Complex
ATP6V0A2	1					1	1	V-ATPase Complex
ATP6V0A4	1					1
ATP6V0C	1	1			1	3	1	V-ATPase Complex
ATP6V0D1	1		1	1	1	4	1	V-ATPase Complex
ATP6V0E1					1	1
ATP6V1A	1				1	2	1	V-ATPase Complex
ATP6V1B2	1				1	2	1	V-ATPase Complex
ATP6V1C1	1				1	2	1	V-ATPase Complex
ATP6V1C2	1					1
ATP6V1D	1				1	2	1	V-ATPase Complex
ATP6V1E1	1				1	2	1	V-ATPase Complex
ATP6V1F					1	1	1	V-ATPase Complex
ATP6V1G1	1	1			1	3	1	V-ATPase Complex
ATP6V1H	1				1	2	1	V-ATPase Complex
ATP8A1	1					1
ATRAID	1	1			1	3
AZU1	1		1			2
B4GALT1	1					1
BACE1			1	1		2	1	Proteases
BAX					1	1
BBC3	1	1				2
BC051665		1				1
BCAN	1					1
BCL10	1	1				2
BCL2L11					1	1
BECN2			1	1		2
BGN	1					1
BLOC1S1	1	1	1	1	1	5	1	Lysosomal Positioning
BLOC1S2	1	1	1	1	1	5	1	Lysosomal Positioning
BLOC1S3			1			1
BLOC1S6			1	1		2
BNIP3			1			1
BORCS5	1	1	1	1	1	5	1	Lysosomal Positioning
BORCS6	1	1	1	1		4	1	Lysosomal Positioning
BORCS7	1	1	1	1	1	5	1	Lysosomal Positioning
BORCS8	1	1	1	1		4	1	Lysosomal Positioning
BPI	1					1
BRD4						0	1	Transcription Regulators
BRI3	1	1				2
BST2	1		1			2
BTK	1					1
BUD23			1	1		2
C12orf66	1					1
C3	1					1
C3AR1	1					1
C6orf120	1					1
C9orf72	1		1			2
CALCRL	1	1				2
CALR			1	1		2	1	Ca-binding proteins
CAP1	1					1
CAPN1	1	1				2
CAPN2	1	1				2
CAT	1	1				2
CAV1			1	1		2
CBL	1					1
CCDC115	1	1				2
CCDC91			1	1		2
CCKAR		1				1
CCT2	1					1
CCT8	1					1
CCZ1	1	1	1	1	1	5	1	Autophagy
CCZ1B	1		1			2
CD164	1	1				2
CD1B	1		1			2
CD1C	1		1			2
CD1D	1		1			2
CD1D1		1		1		2
CD1D2				1		1
CD1E	1					1
CD300LD3		1		1		2
CD34	1	1				2
CD3G			1			1
CD63	1	1	1	1	1	5	1	Membrane and Membrane-Associated Proteins
CD68	1	1	1	1	1	5	1	Membrane and Membrane-Associated Proteins
CD74	1	1	1	1		4
CDIP1	1	1	1	1		4
CEACAM6	1					1
CEACAM8	1					1
CECR1	1					1
CEMIP			1	1		2
CFTR	1					1
CHGA	1					1
CHID1	1	1	1	1		4
CHIT1	1	1				2
CHMP1A			1	1		2	1	ESCRT Complex
CHMP1B			1			1	1	ESCRT Complex
CHMP1B1				1		1	1	ESCRT Complex
CHMP1B2				1		1	1	ESCRT Complex
CHMP2A			1	1		2	1	ESCRT Complex
CHMP2B	1	1	1	1		4	1	ESCRT Complex
CHMP3			1	1		2	1	ESCRT Complex
CHMP4A			1			1	1	ESCRT Complex
CHMP4B			1	1		2	1	ESCRT Complex
CHMP4C			1	1		2	1	ESCRT Complex
CHMP5			1	1		2	1	ESCRT Complex
CHMP6			1	1		2	1	ESCRT Complex
CKAP4	1					1
CLCN3			1	1		2	1	Transporters, Channels, and Exchangers
CLCN4			1	1		2	1	Transporters, Channels, and Exchangers
CLCN5	1					1	1	Transporters, Channels, and Exchangers
CLCN6	1					1	1	Transporters, Channels, and Exchangers
CLCN7	1	1	1		1	4	1	Transporters, Channels, and Exchangers
CLEC16A	1	1	1	1		4
CLN3	1	1	1	1	1	5	1	Membrane and Membrane-Associated Proteins
CLN5	1	1	1	1	1	5	1	Membrane and Membrane-Associated Proteins
CLTA	1					1	1	Endocytosis
CLTC	1	1				2	1	Endocytosis
CLVS1			1	1		2
CLVS2			1	1		2
CMTM6	1					1
CMYA5			1	1		2
COL6A1	1					1
CORO1A			1	1		2
CP	1					1
CPLX2	1					1
CPNE1	1					1
CPNE3	1					1
CPPED1	1					1
CPQ	1	1	1	1		4
CPVL					1	1	1	Proteases
CREG1	1				1	2
CRHBP	1	1				2
CSPG4	1					1
CSPG5	1					1
CST3	1	1				2
CTBS	1	1	1	1	1	5	1	Hydrolysis of Glycosidic Bonds
CTRB1		1				1
CTS3		1				1
CTS6		1				1
CTS7		1		1		2
CTS8		1		1		2
CTSA	1	1	1	1	1	5	1	Proteases
CTSB	1	1	1	1	1	5	1	Proteases
CTSC	1	1	1	1	1	5	1	Proteases
CTSD	1	1	1	1	1	5	1	Proteases
CTSF	1	1			1	3	1	Proteases
CTSG	1					1	1	Proteases
CTSH	1	1	1	1	1	5	1	Proteases
CTSJ		1				1
CTSK	1	1	1	1	1	5	1	Proteases
CTSL	1	1	1	1		4	1	Proteases
CTSL1					1	1
CTSLL3		1				1
CTSM		1		1		2
CTSO	1	1	1	1	1	5	1	Proteases
CTSQ		1				1
CTSR		1		1		2
CTSS	1	1			1	3	1	Proteases
CTSV	1		1			2	1	Proteases
CTSW	1	1				2
CTSZ	1	1			1	3	1	Proteases
CUBN	1	1	1	1		4
CXCR2	1	1				2
CXCR4	1	1	1	1		4
CYB561	1	1				2
CYB561A3	1	1	1	1		4
CYB5R3	1					1
CYBRD1	1	1				2
DAB2	1					1
DAGLB	1					1
DCN	1					1
DCTN1			1	1		2
DDOST	1					1
DEFA1	1					1
DEFA3	1					1
DEFA4	1					1
DENND3			1	1		2
DEPDC5	1	1	1	1		4	1	GATOR Complex
DEPTOR					1	1	1	mTOR Complex 1
DIRC2	1	1			1	3
DNAJC13	1					1
DNAJC3	1					1
DNAJC5	1					1
DNASE2	1	1	1	1	1	5	1	Nucleases
DNASE2B	1	1	1	1		4
DOC2A	1	1				2
DPP4	1					1
DPP7	1	1	1	1	1	5	1	Proteases
DRAM1	1	1	1	1		4
DRAM2	1	1	1	1		4
DSN1	1					1
DTNBP1			1			1	1	Lysosomal Positioning
DTX3L	1	1	1	1		4	1	Ubiquitination
DYNC1H1	1					1
DYNC1I2			1	1		2
DYNC1LI1		1				1
DYNC1LI2	1	1				2
ECE1	1					1
EEF1A1	1					1
EEF1A2	1					1
EGF	1					1
ELANE	1					1
ENPEP	1					1
ENPP1	1					1
ENTPD4			1	1	1	3
EPDR1	1	1	1	1	1	5	1	Lipid Metabolism
EPG5			1	1		2
EPOR			1	1		2
EVA1A	1	1	1	1		4
F2RL1			1	1		2
FABP5	1					1
FAF2	1					1
FASLG	1	1	1	1		4
FGFR2			1	1		2
FGFR3		1				1
FGR			1			1
FLCN	1		1	1		3	1	mTOR Complex 1-Associated
FLOT1	1					1	1	Membrane and Membrane-Associated Proteins
FMOD	1					1
FNBP1	1	1	1	1		4
FNIP1			1	1		2	1	mTOR Complex 1-Associated
FNIP2			1	1		2	1	mTOR Complex 1-Associated
FPR1	1					1
FRK	1					1
FTH1	1	1				2	1	Iron Metabolism
FTL	1					1	1	Iron Metabolism
FTL1		1				1	1	Iron Metabolism
FTL2		1				1
FUCA1	1	1	1	1	1	5	1	Hydrolysis of Glycosidic Bonds
FUCA2	1	1				2
FYCO1	1	1	1	1	1	5	1	Membrane and Membrane-Associated Proteins
FZD6			1			1
GAA	1	1	1	1	1	5	1	Hydrolysis of Glycosidic Bonds
GABARAP	1	1				2	1	Autophagy
GABARAPL1			1	1		2
GABARAPL2			1	1		2
GABARAPL3			1			1
GALC	1	1			1	3	1	Hydrolysis of Glycosidic Bonds
GALNS	1	1			1	3	1	Sulfatases
GBA	1	1	1	1	1	5	1	Hydrolysis of Glycosidic Bonds
GC	1					1
GCA	1					1
GDAP2	1					1
GDI2	1					1
GFAP	1	1				2
GGH	1	1			1	3	1	Proteases
GIF	1					1
GIMAP5	1	1	1	1		4
GJA1	1	1				2
GLA	1	1	1		1	4	1	Hydrolysis of Glycosidic Bonds
GLB1	1	1	1	1	1	5	1	Hydrolysis of Glycosidic Bonds
GLIPR1	1					1
GLMP	1	1	1	1	1	5	1	Membrane and Membrane-Associated Proteins
GM2A	1	1			1	3	1	Hydrolysis of Glycosidic Bonds
GNA11	1					1
GNAI1	1					1
GNAI3	1					1
GNAQ	1					1
GNB1	1		1			2
GNB2	1					1
GNB4	1					1
GNLY	1					1
GNPTAB			1			1
GNS	1	1			1	3	1	Sulfatases
GOPC	1		1	1		3
GOT1	1	1				2
GPC1	1					1
GPC2	1					1
GPC3	1	1				2
GPC4	1					1
GPC5	1					1
GPC6	1					1
GPLD1	1					1
GPR137			1	1		2	1	Membrane and Membrane-Associated Proteins
GPR137B	1		1	1		3
GPR137C			1	1		2	1	Membrane and Membrane-Associated Proteins
GPR143	1	1	1	1		4
GPR89A				1		1
GPRASP1			1	1		2
GRIA1			1	1		2
GRIA2			1	1		2
GRIN1			1	1		2
GRIN2A			1	1		2
GRIN2C			1	1		2
GRN	1	1	1	1		4	1	Lysosomal lumen, exact function unknown
GUSB	1	1	1	1	1	5	1	Hydrolysis of Glycosidic Bonds
GUSBP11	1					1
GYG1	1					1
GZMA					1	1
GZMB		1	1	1	1	4
H2-AA		1				1
H2-DMA		1		1		2	1	Antigen Presentation
H2-DMB1		1		1		2	1	Antigen Presentation
H2-DMB2		1				1
H2-EB1		1				1
H2-OB		1				1
HAP1	1	1	1			3
HCK	1	1	1	1		4
HEBP2	1					1
HEXA	1	1			1	3	1	Hydrolysis of Glycosidic Bonds
HEXB	1	1	1	1	1	5	1	Hydrolysis of Glycosidic Bonds
HGS	1	1				2
HGSNAT	1	1	1	1	1	5	1	Transferases
HLA-DMA	1		1			2
HLA-DMB	1		1			2
HLA-DOA	1		1			2
HLA-DOB	1					1
HLA-DPA1	1		1			2
HLA-DPB1	1		1			2	1	Antigen Presentation
HLA-DQA1	1		1			2
HLA-DQA2	1		1			2
HLA-DQB1	1		1			2
HLA-DQB2	1		1			2
HLA-DRA	1		1			2
HLA-DRB1	1		1			2
HLA-DRB3	1		1			2
HLA-DRB4	1		1			2
HLA-DRB5	1		1			2
HLA-F			1			1
HLA-H	1					1
HMGB1			1	1		2	1	Autophagy
HMHA1	1					1
HOOK1			1	1		2
HOOK2				1		1
HPS1	1		1	1		3
HPS3			1			1
HPS4	1	1	1	1		4
HPS5			1	1		2
HPS6	1	1	1	1		4
HPSE	1	1	1	1	1	5	1	Hydrolysis of Glycosidic Bonds
HRG	1	1				2
HRNR	1					1
HSP90AA1	1					1
HSP90AB1	1	1				2
HSPA8	1	1				2
HSPG2	1					1
HYAL1	1	1	1	1	1	5	1	Hydrolysis of Glycosidic Bonds
HYAL2	1	1			1	3
HYAL3	1	1	1	1		4
IDS	1	1	1	1	1	5	1	Sulfatases
IDUA	1	1			1	3	1	Hydrolysis of Glycosidic Bonds
IFI30	1	1	1	1	1	5	1	Reductases
IFITM1			1	1		2	1	Membrane and Membrane-Associated Proteins
IFITM2			1	1		2	1	Membrane and Membrane-Associated Proteins
IFITM3	1	1				2	1	Membrane and Membrane-Associated Proteins
IFNAR1	1	1	1	1		4
IGF2R	1	1	1	1		4	1	Membrane and Membrane-Associated Proteins
IL1B	1	1	1	1		4
IL4I1	1	1	1	1	1	5
IMPDH1	1					1
IRGM1		1		1		2
IST1	1					1
ITFG2	1	1	1	1		4
ITM2C	1	1	1	1		4
KCNE1	1					1
KCNE2	1					1
KCNJ6			1	1		2
KCNJ9			1	1		2
KCNQ1	1	1				2
KERA	1					1
KIAA1324	1	1		1		3
KICS2			1	1		2	1	KICSTOR Complex
KIF2A		1		1		2
KIF5B			1	1		2	1	Lysosomal Positioning
KIT	1					1
KLHL22	1	1	1	1		4
KPTN	1	1	1	1		4
KXD1	1	1	1	1	1	5	1	Lysosomal Positioning
LAMP1	1	1	1	1	1	5	1	Membrane and Membrane-Associated Proteins
LAMP2	1	1	1	1	1	5	1	Membrane and Membrane-Associated Proteins
LAMP3	1	1	1	1	1	5	1	Membrane and Membrane-Associated Proteins
LAMP5		1			1	2	1	Membrane and Membrane-Associated Proteins
LAMTOR1	1	1	1	1	1	5	1	mTOR Complex 1-Associated
LAMTOR2	1	1	1	1	1	5	1	mTOR Complex 1-Associated
LAMTOR3	1		1	1	1	4	1	mTOR Complex 1-Associated
LAMTOR4	1	1	1	1	1	5	1	mTOR Complex 1-Associated
LAMTOR5	1	1	1	1	1	5	1	mTOR Complex 1-Associated
LAPTM4A	1	1			1	3	1	Membrane and Membrane-Associated Proteins
LAPTM4B	1	1	1	1	1	5	1	Membrane and Membrane-Associated Proteins
LAPTM5	1	1	1	1	1	5	1	Membrane and Membrane-Associated Proteins
LARS	1	1				2
LAT	1					1
LAT2	1					1
LDLR	1	1				2	1	Apolipoprotein-related
LGALS3					1	1	1	Galectins
LGALS8					1	1	1	Galectins
LGMN	1	1	1	1	1	5	1	Proteases
LHCGR		1				1
LINC00961	1		1			2
LIPA	1	1			1	3	1	Lipases
LITAF	1	1	1	1	1	5
LMBRD1	1	1	1	1	1	5	1	Membrane and Membrane-Associated Proteins
LNPEP	1					1
LPCAT1	1					1
LPL			1	1		2
LRBA	1	1	1	1		4
LRMP	1					1
LRP1	1					1
LRP2	1					1
LRP4			1	1		2
LRRC8A			1	1		2	1	Transporters, Channels, and Exchangers
LRRC8E			1	1		2	1	Transporters, Channels, and Exchangers
LRRK2	1	1	1	1		4
LUM	1					1
LYN	1					1
LYZ	1					1
M6PR	1	1	1	1		4	1	Membrane and Membrane-Associated Proteins
MAGT1	1					1
MAN2B1	1	1	1	1	1	5	1	Hydrolysis of Glycosidic Bonds
MAN2B2	1	1			1	3	1	Hydrolysis of Glycosidic Bonds
MANBA	1	1	1	1	1	5	1	Hydrolysis of Glycosidic Bonds
MAP1LC3A	1	1				2
MAP1LC3B	1	1				2
MAP6			1			1
MAPK1	1					1
MARC2	1	1	1	1		4	1	Transporters, Channels, and Exchangers
MARCH4			1	1		2
MARCH9	1	1	1	1		4
MARCHF1			1	1		2	1	Ubiquitination
MARCHF2			1	1		2	1	Ubiquitination
MARCHF8			1	1		2	1	Ubiquitination
MBTPS1			1	1		2
MCOLN1	1	1	1	1	1	5	1	Transporters, Channels, and Exchangers
MCOLN2	1	1	1	1		4	1	Transporters, Channels, and Exchangers
MCOLN3	1	1				2	1	Transporters, Channels, and Exchangers
MCRS1					1	1
MEAK7			1	1		2	1	mTOR Complex 1-Associated
MEF2BNB					1	1
MFSD1			1	1	1	3	1	Transporters, Channels, and Exchangers
MFSD12	1		1			2	1	Transporters, Channels, and Exchangers
MFSD8	1	1	1	1	1	5	1	Transporters, Channels, and Exchangers
MGAT4A				1		1
MGST1	1					1
MIC1		1				1
MILR1	1	1				2
MIOS	1	1				2	1	GATOR Complex
MiTF						0	1	Transcription Regulators
MLC1	1	1				2
MLST8			1	1	1	3	1	mTOR Complex 1
MMD	1		1	1		3
MMP13		1				1
MNDA	1					1
MON1A			1	1		2
MPO	1	1			1	3
MPZ	1	1				2
MREG			1	1		2	1	Membrane and Membrane-Associated Proteins
MRGPRX2	1					1
MT1		1				1
MT1X	1					1
MTOR	1	1	1	1	1	5	1	mTOR Complex 1
MYC						0	1	Transcription Regulators
MYLPF	1					1
MYO5A	1	1				2
MYO6	1					1
MYO7A	1	1				2
NAAA	1	1	1	1	1	5	1	Lipid Metabolism
NAGA	1	1			1	3	1	Hydrolysis of Glycosidic Bonds
NAGLU	1		1		1	3	1	Hydrolysis of Glycosidic Bonds
NAPG	1					1
NAPRT	1					1
NAPSA	1	1				2
NBR1	1	1	1	1		4	1	Autophagy
NCAN	1					1
NCF1	1					1
NCF2	1					1
NCF4	1					1
NCOA4	1	1				2
NCSTN	1	1			1	3	1	Proteases
NDUFC2	1					1
NEDD4			1	1		2	1	Ubiquitination
NEU1	1	1	1	1	1	5	1	Hydrolysis of Glycosidic Bonds
NEU3			1	1		2	1	Hydrolysis of Glycosidic Bonds
NEU4	1		1	1	1	4	1	Hydrolysis of Glycosidic Bonds
NFAM1	1					1
NHLRC3	1					1
NINL			1	1		2
NOS1		1				1
NPC1	1	1	1	1	1	5	1	Transporters, Channels, and Exchangers
NPC2	1	1	1	1	1	5	1	Lipid Metabolism
NPPA	1	1				2
NPRL2	1	1	1	1		4	1	GATOR Complex
NPRL3	1	1	1	1		4	1	GATOR Complex
NR4A3	1					1
NSF	1					1
NSG1	1	1	1	1		4
NSG2	1	1	1	1		4
OCA2	1	1				2
OGN	1					1
OMD	1					1
ORM2	1					1
OSBPL1A			1	1		2	1	Cholesterol Homeostasis
OSBPL5			1	1		2
OSTM1	1	1	1	1	1	5	1	Membrane and Membrane-Associated Proteins
P2RX4	1					1
P2RY2		1				1
PA2G4	1					1
PACS2					1	1
PADI2	1					1
PAX2	1	1				2
PCSK9	1	1	1	1		4	1	Cholesterol Homeostasis
PCYOX1	1	1	1	1	1	5	1	Lipid Metabolism
PDGFRB	1	1	1	1		4
PEBP4	1	1				2
PGCP					1	1
PHETA1			1	1		2
PHETA2			1	1		2
PI4K2A	1					1
PIGR	1					1	1	Autophagy
PIK3C3	1	1	1	1		4
PIK3CD	1					1
PIK3CG	1					1
PIP4P1			1	1		2	1	Lysosomal Positioning
PLA2G10			1	1		2
PLA2G15	1	1	1	1	1	5	1	Lipases
PLA2G3	1					1
PLA2G4E	1	1				2
PLA2G4F	1	1				2
PLAA			1	1		2	1	Ubiquitination
PLAC8	1					1
PLBD1	1	1				2	1	Lipases
PLBD2	1	1			1	3	1	Lipases
PLD1	1					1
PLD3			1	1	1	3	1	Nucleases
PLEKHF1	1	1	1	1		4
PLEKHM1	1	1	1	1		4	1	Lysosomal Positioning
PLEKHM2			1	1		2	1	Lysosomal Positioning
PNPLA7	1	1				2
PON2	1	1				2
PPT1	1	1	1	1	1	5	1	Protein palmithoyl thioesterases
PPT2	1	1			1	3	1	Protein palmithoyl thioesterases
PQLC2	1	1			1	3
PRCP	1	1	1	1	1	5	1	Proteases
PRDX6	1	1	1	1		4	1	Reductases
PRELP	1					1
PRF1	1	1	1	1		4
PRKCD	1					1
PRSS16	1	1				2
PRSS2	1					1
PRSS57	1	1				2
PRTN3	1	1				2
PSAP	1	1	1	1	1	5	1	Lipid Metabolism
PSAPL1	1	1				2
PSEN1	1	1				2
PSMD1	1					1
PTGES2	1					1
PTTG1IP					1	1
PYCARD	1					1
PYGB	1					1	1	Hydrolysis of Glycosidic Bonds
RAB12	1	1	1	1		4	1	Rab GTPases
RAB14	1	1				2	1	Rab GTPases
RAB20			1	1		2
RAB23			1	1		2	1	Rab GTPases
RAB27A	1	1	1	1		4
RAB29			1	1		2
RAB2A	1					1	1	Rab GTPases
RAB34			1	1		2	1	Rab GTPases
RAB37	1					1
RAB38	1	1				2
RAB39A	1	1	1	1		4	1	Rab GTPases
RAB3A			1	1		2	1	Rab GTPases
RAB3D	1					1	1	Rab GTPases
RAB44	1					1
RAB5C	1					1	1	Rab GTPases
RAB7A	1	1	1	1		4	1	Rab GTPases
RAB7B	1	1				2
RAB9A	1	1				2	1	Rab GTPases
RAMP2	1					1
RAMP3	1	1				2
RAP1B	1					1
RASGRP1	1					1
RBSN			1	1		2	1	Rab GTPases
RDH14	1					1
REN1					1	1
RETN	1					1
RETREG1			1	1		2
RHEB	1				1	2	1	mTOR Complex 1-Associated
RHOB			1	1		2
RILP	1	1	1	1		4
RMC1	1		1	1		3
RNASE2	1	1	1	1		4
RNASE3	1					1
RNASE6	1	1	1	1		4
RNASET2	1	1	1	1	1	5	1	Nucleases
RNF115			1	1		2
RNF13	1	1	1	1		4	1	Ubiquitination
RNF152	1	1				2
RNF183			1	1		2
RNF19B	1	1				2
RPTOR	1	1	1	1	1	5	1	mTOR Complex 1
RRAGA	1	1	1	1	1	5	1	mTOR Complex 1-Associated
RRAGB	1	1	1	1	1	5	1	mTOR Complex 1-Associated
RRAGC	1	1	1	1	1	5	1	mTOR Complex 1-Associated
RRAGD	1	1	1	1	1	5	1	mTOR Complex 1-Associated
RUBCN	1	1	1	1		4
RUBCNL			1	1		2
RUFY4			1	1		2
S100A13	1					1
S100A7	1					1
S100A8			1	1		2
S100A9			1	1		2
SCARB1	1					1
SCARB2	1	1	1	1	1	5	1	Transporters, Channels, and Exchangers
SCPEP1					1	1
SDC1	1					1
SDC2	1					1
SDC3	1					1
SDC4	1					1
SDCBP	1					1
SEC13	1	1	1	1		4	1	GATOR Complex
SEH1L	1	1	1	1		4	1	GATOR Complex
SERINC2					1	1
SERPINA3	1					1
SERPINB13	1					1
SERPINB3	1					1
SFTPB	1	1				2
SFTPD	1					1
SGK3			1	1		2
SGSH	1	1	1	1	1	5	1	Sulfatases
SH3BP4			1	1		2
SHKBP1	1	1	1	1		4
SIAE	1	1	1	1	1	5	1	Hydrolysis of Glycosidic Bonds
SIDT1			1	1		2
SIDT2	1	1	1	1	1	5	1	Transporters, Channels, and Exchangers
SLC11A1	1	1				2
SLC11A2	1	1	1			3	1	Transporters, Channels, and Exchangers
SLC12A4	1					1	1	Transporters, Channels, and Exchangers
SLC15A3	1	1	1	1		4
SLC15A4	1		1	1		3	1	Transporters, Channels, and Exchangers
SLC17A1	1	1				2
SLC17A2	1	1				2
SLC17A3	1	1				2
SLC17A4	1	1				2
SLC17A5	1	1	1		1	4	1	Transporters, Channels, and Exchangers
SLC26A11	1	1	1		1	4	1	Transporters, Channels, and Exchangers
SLC29A3	1	1	1	1		4	1	Transporters, Channels, and Exchangers
SLC2A1			1	1		2	1	Transporters, Channels, and Exchangers
SLC2A6			1	1		2
SLC2A8	1					1	1	Transporters, Channels, and Exchangers
SLC30A2	1		1			2
SLC30A3	1	1	1	1		4
SLC30A4	1	1	1	1		4
SLC35F6	1	1	1	1	1	5	1	Transporters, Channels, and Exchangers
SLC36A1	1	1	1	1	1	5	1	Transporters, Channels, and Exchangers
SLC37A2					1	1
SLC37A3					1	1	1	Transporters, Channels, and Exchangers
SLC38A7					1	1	1	Transporters, Channels, and Exchangers
SLC38A9	1	1	1	1	1	5	1	Transporters, Channels, and Exchangers
SLC39A14			1	1		2	1	Transporters, Channels, and Exchangers
SLC39A8			1	1		2	1	Transporters, Channels, and Exchangers
SLC3A2						0
SLC44A2			1	1		2	1	Transporters, Channels, and Exchangers
SLC46A3	1					1	1	Transporters, Channels, and Exchangers
SLC48A1					1	1
SLC49A4	1	1	1	1		4
SLC66A1			1	1		2	1	Transporters, Channels, and Exchangers
SLC66A4						0
SLC7A14			1	1		2
SLC7A5	1	1	1	1		4
SLCO4C1			1	1		2	1	Transporters, Channels, and Exchangers
SMCR8	1					1
SMPD1			1			1
SNAP23	1	1	1	1	1	5	1	Lipid Metabolism
SNAP29	1	1				2	1	Autophagy
SNAPIN	1		1	1		3	1	SNARE Proteins
SNCA	1	1	1	1	1	5	1	Lysosomal Positioning
SNX1	1					1
SNX14	1	1	1	1		4	1	Membrane and Membrane-Associated Proteins
SNX16	1	1	1	1		4
SNX2	1	1				2	1	Membrane and Membrane-Associated Proteins
SNX27	1	1				2	1	Transporters, Channels, and Exchangers
SNX6			1	1		2	1	Transporters, Channels, and Exchangers
SOD1	1	1				2
SORL1	1	1				2
SORT1			1	1		2
SPAAR	1	1	1	1		4	1	Membrane and Membrane-Associated Proteins
SPACA7			1	1		2
SPAG9	1		1	1		3
SPAR			1	1		2	1	AP Complexes
SPATA18		1				1
SPG11			1	1		2
SPHK2	1					1
SPNS1	1	1	1	1		4
SPPL2A	1		1	1		3	1	Membrane and Membrane-Associated Proteins
SPPL2B	1	1	1	1	1	5	1	Proteases
SPPL2C	1	1	1	1		4	1	Proteases
SQSTM1	1	1				2
SRC	1	1	1	1		4	1	Autophagy
SRGN	1	1				2
STAMBP	1	1	1	1		4
STARD3			1			1	1	Membrane and Membrane-Associated Proteins
STARD3NL	1					1
STBD1	1					1
STK11IP			1	1		2	1	Autophagy
STOM	1					1
STS	1					1
STX17	1					1
STX3			1	1		2	1	SNARE Proteins
STX7	1	1				2	1	SNARE Proteins
STX8	1	1	1	1		4	1	SNARE Proteins
STXBP2	1	1				2	1	SNARE Proteins
SULT1C2	1	1				2	1	SNARE Proteins
SURF4		1		1		2
SYNGR1	1					1
SYT11	1		1	1		3
SYT7	1	1	1	1		4
SZT2	1	1	1	1		4
TBC1D25	1	1	1	1		4	1	KICSTOR Complex
TCIRG1			1	1		2	1	V-ATPase Complex
TCN2	1					1
TECPR1	1					1
TFE3	1	1	1	1		4	1	Transcription Regulators
TFEB			1	1		2	1	Transcription Regulators
TFEC			1	1		2	1	Transcription Regulators
TIAL1			1			1
TLDC1	1					1
TLR3	1					1
TLR7	1					1
TLR8	1	1	1	1		4
TLR9	1					1
TM4SF5			1	1		2
TM6SF1	1	1	1	1		4
TM7SF1	1	1			1	3
TM9SF1			1	1	1	3
TMBIM1	1	1				2	1	Membrane and Membrane-Associated Proteins
TMEM104	1	1	1	1		4	1	Membrane and Membrane-Associated Proteins
TMEM106B					1	1	1	Membrane and Membrane-Associated Proteins
TMEM127	1	1	1	1	1	5	1	Membrane and Membrane-Associated Proteins
TMEM150A			1	1	1	3
TMEM150B	1	1				2
TMEM150C	1	1				2
TMEM165	1	1	1	1		4
TMEM175	1	1	1	1		4	1	Membrane and Membrane-Associated Proteins
TMEM179B	1	1	1	1	1	5	1	Membrane and Membrane-Associated Proteins
TMEM192	1					1	1	Membrane and Membrane-Associated Proteins
TMEM199	1	1			1	3	1	Membrane and Membrane-Associated Proteins
TMEM25			1	1		2	1	Membrane and Membrane-Associated Proteins
TMEM30A	1	1				2
TMEM55A	1					1	1	Membrane and Membrane-Associated Proteins
TMEM55B	1	1			1	3	1	Phosphatases
TMEM59	1	1			1	3
TMEM63A	1	1	1	1		4	1	Membrane and Membrane-Associated Proteins
TMEM74	1	1	1	1		4	1	Membrane and Membrane-Associated Proteins
TMEM79	1	1			1	3
TMEM8A	1	1	1	1		4
TMEM9	1	1			1	3	1	Membrane and Membrane-Associated Proteins
TMEM97	1	1	1		1	4	1	Membrane and Membrane-Associated Proteins
TMEM9B	1	1	1	1		4	1	Membrane and Membrane-Associated Proteins
TNFAIP3	1	1	1	1		4
TOLLIP	1	1	1	1		4
TOM1	1					1	1	Autophagy
TOM1L1	1					1
TPCN1	1		1	1		3	1	Transporters, Channels, and Exchangers
TPCN2	1	1	1	1	1	5	1	Transporters, Channels, and Exchangers
TPP1	1	1	1	1	1	5	1	Proteases
TPSAB1	1	1	1	1	1	5	1	Proteases
TRAPPC1		1				1
TREML4	1					1
TRIM23		1		1		2
TRIM29	1	1	1	1		4	1	Ubiquitination
TRIP10	1	1	1	1		4
TRMT112	1	1	1	1		4
TRPM2			1	1		2
TSC2	1	1	1	1		4	1	mTOR Complex 1-Associated
TSPAN1	1	1			1	3
TTR	1	1			1	3
TTYH2	1					1
TTYH3			1		1	2	1	Transporters, Channels, and Exchangers
TUBB					1	1
TUBB4B	1					1
TXNDC5	1					1
TYR	1					1
TYRP1	1					1
UBA1				1		1
UBA52	1	1				2
UBXN6	1					1
UCHL1	1	1	1	1		4
UNC13D			1	1		2	1	Ubiquitination
UNC93B1	1	1	1			3	1	Exocytosis
USP24	1	1	1	1		4
USP4			1			1
USP5	1					1
USP6	1					1	1	Proteases
UVRAG	1					1
VAMP4	1	1	1	1		4
VAMP7	1					1	1	SNARE Proteins
VAMP8	1	1	1	1		4	1	SNARE Proteins
VAPA	1	1	1	1	1	5	1	SNARE Proteins
VASN	1					1
VAT1	1					1
VCAN	1					1
VCP	1					1
VLDLR	1		1	1		3
VMA21	1					1
VNN1	1				1	2
VPS11	1					1	1	HOPS/CORVET Complex
VPS13A	1	1	1	1		4	1	HOPS/CORVET Complex
VPS16			1	1		2	1	HOPS/CORVET Complex
VPS18	1	1	1	1		4	1	HOPS/CORVET Complex
VPS26A	1	1	1	1		4	1	HOPS/CORVET Complex
VPS33A	1	1				2	1	CSC complex
VPS33B	1	1	1	1		4	1	HOPS/CORVET Complex
VPS35	1	1	1	1		4
VPS36	1	1	1			3	1	ESCRT Complex
VPS39	1	1				2	1	HOPS/CORVET Complex
VPS41	1	1	1	1		4	1	HOPS/CORVET Complex
VPS4A	1	1	1	1		4	1	HOPS/CORVET Complex
VPS4B	1	1	1	1		4	1	ESCRT Complex
VPS52			1	1		2	1	ESCRT Complex
VPS53			1			1
VPS54			1			1
VTA1			1			1	1	ESCRT Complex
VTI1B			1	1		2	1	SNARE Proteins
WDR11	1	1	1	1		4	1	WDR Proteins
WDR24	1					1	1	WDR Proteins
WDR41	1	1	1	1		4	1	GATOR Complex
WDR45	1					1
WDR45B			1	1		2
WDR48			1	1		2
WDR59	1	1	1	1		4	1	WDR Proteins
WDR81	1	1	1	1		4	1	GATOR Complex
WIPI1	1	1				2	1	WDR Proteins
WIPI2			1	1		2
YOD1			1	1		2
ZC3HAV1			1	1		2
ZFYVE26		1				1
ZKSCAN3	1					1	1	Transcription Regulators
ZNRF1			1	1		2
ZNRF2	1	1	1	1		4
